# Supplementary figures and images for: Universality of clonal dynamics poses fundamental limits to identify stem cell self-renewal strategies
Source: eLife journal article supplement (doi:10.7554/elife.56532), 2020-07-20

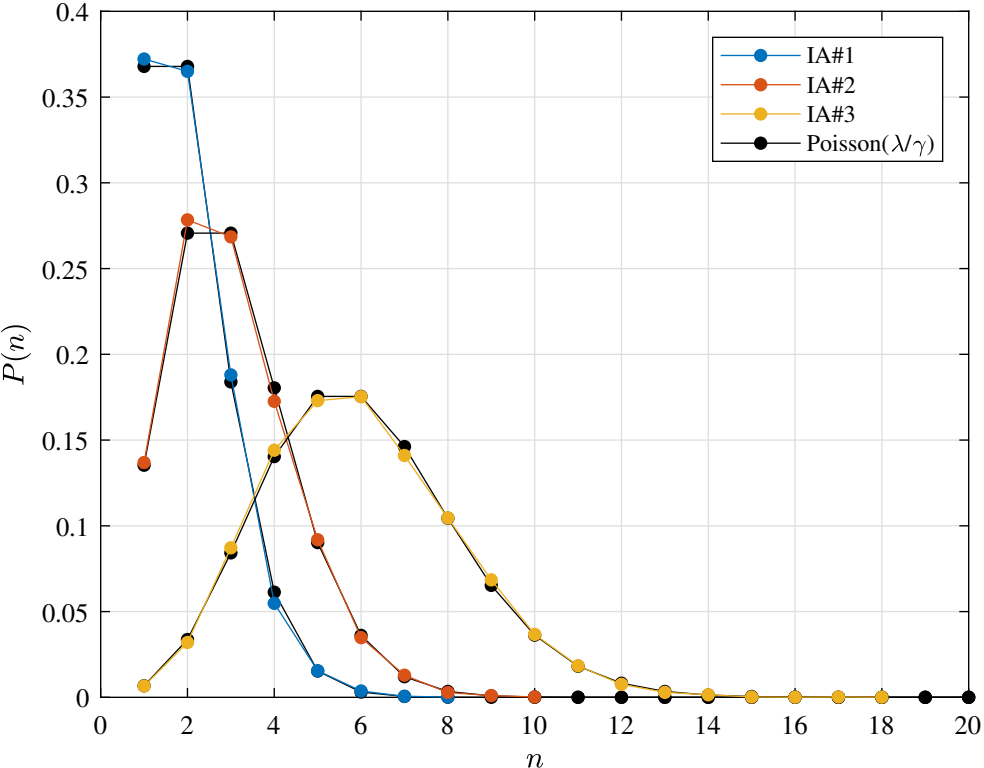

Supplement: supp [file elife_poa_e56532_Appendix_figure_1.pdf › elife_poa_e56532_Appendix_figure_1.pdf]

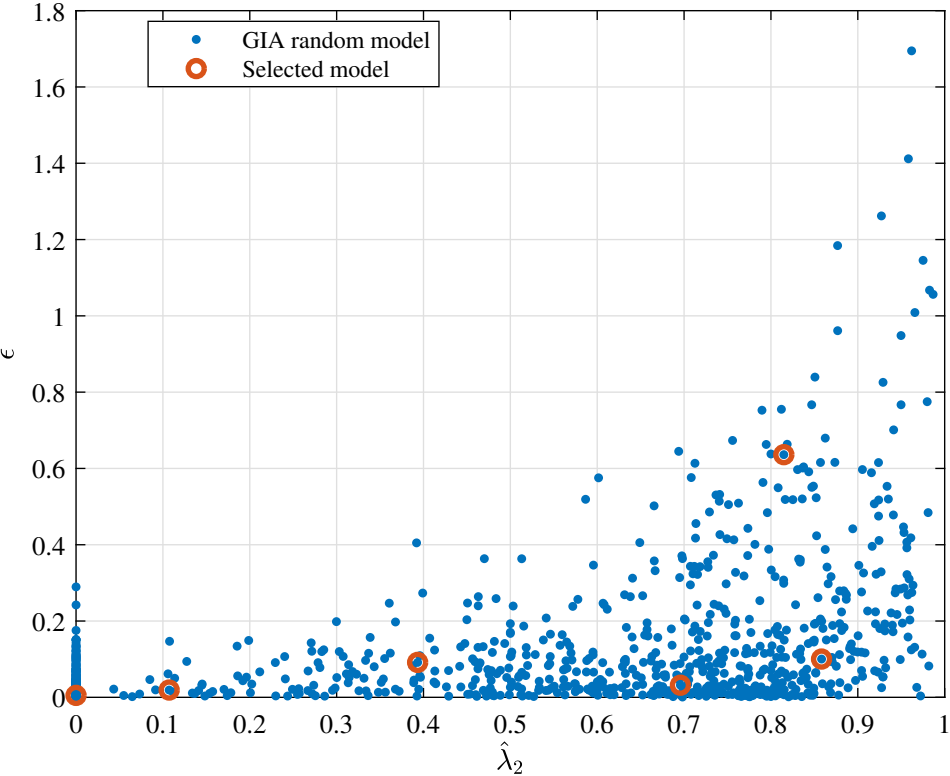

Supplement: supp [file elife_poa_e56532_Appendix_figure_10.pdf › elife_poa_e56532_Appendix_figure_10.pdf]

$$\hat{\lambda}_1 = 0.50, \hat{\lambda}_2 = 0.00, \bar{n}_C^* = 0.50$$

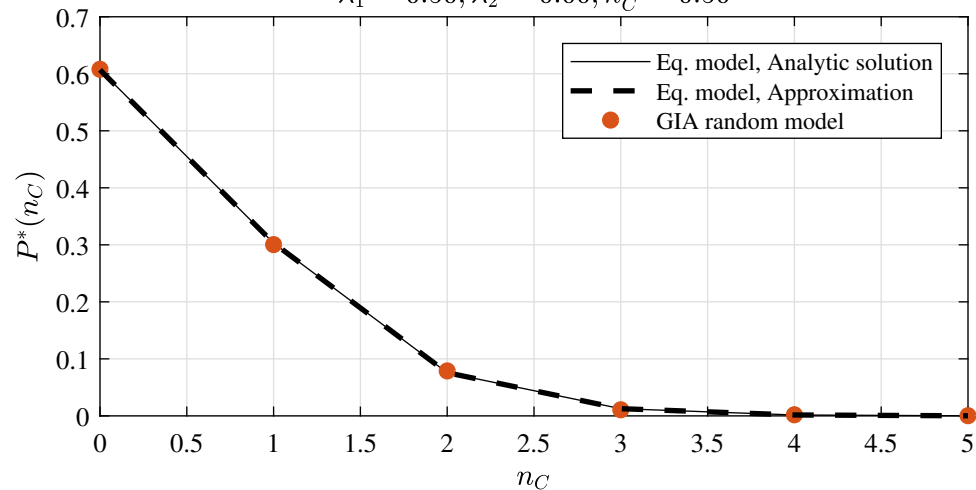

$$\hat{\lambda}_1 = 3.12, \hat{\lambda}_2 = 0.11, \bar{n}_C^* = 3.49$$

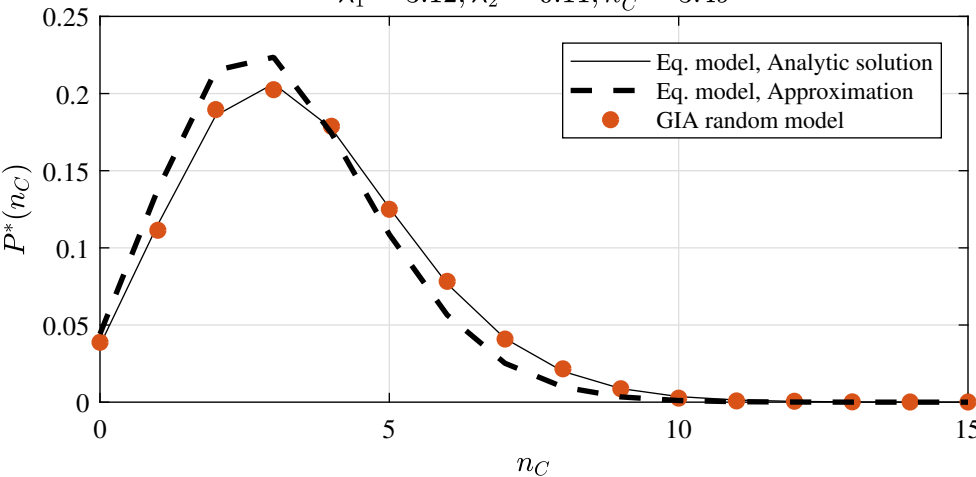

Supplement: supp [file elife_poa_e56532_Appendix_figure_11.pdf › elife_poa_e56532_Appendix_figure_11.pdf]

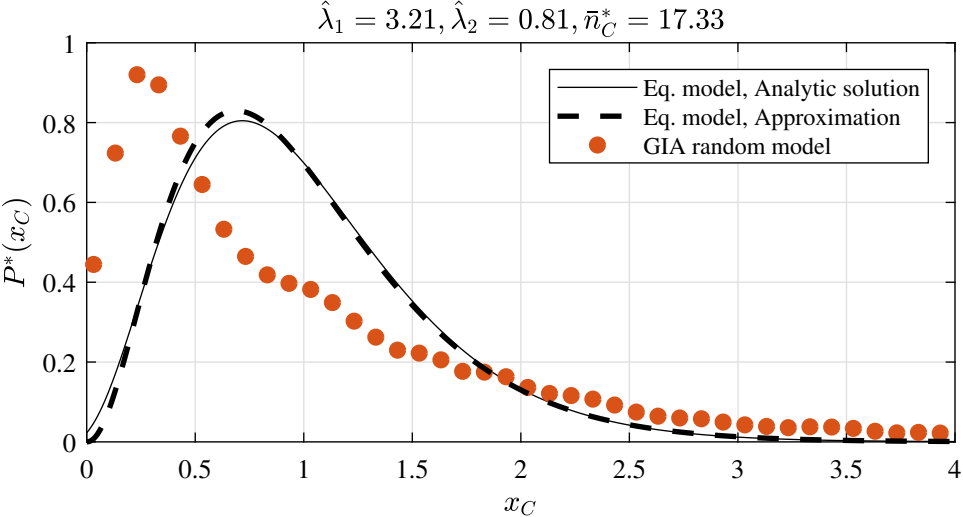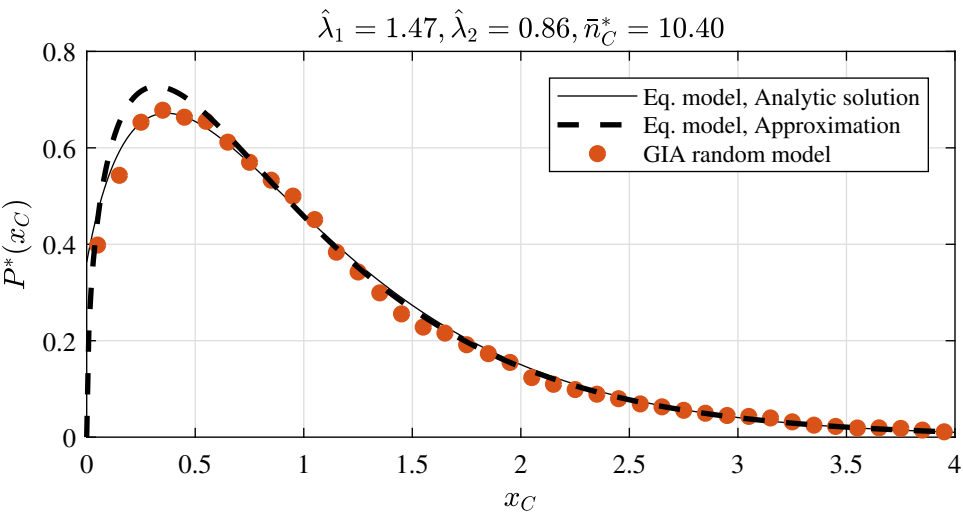

Supplement: supp [file elife_poa_e56532_Appendix_figure_12.pdf › elife_poa_e56532_Appendix_figure_12.pdf]

$$\hat{\lambda}_1 = 0.77, \hat{\lambda}_2 = 0.39, \bar{n}_C^* = 1.27$$

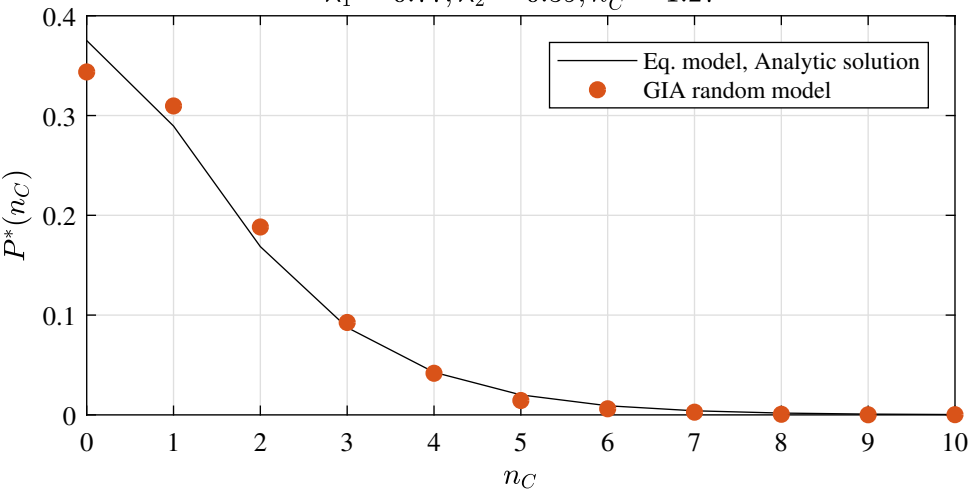

$$\hat{\lambda}_1 = 4.94, \hat{\lambda}_2 = 0.70, \bar{n}_C^* = 16.25$$

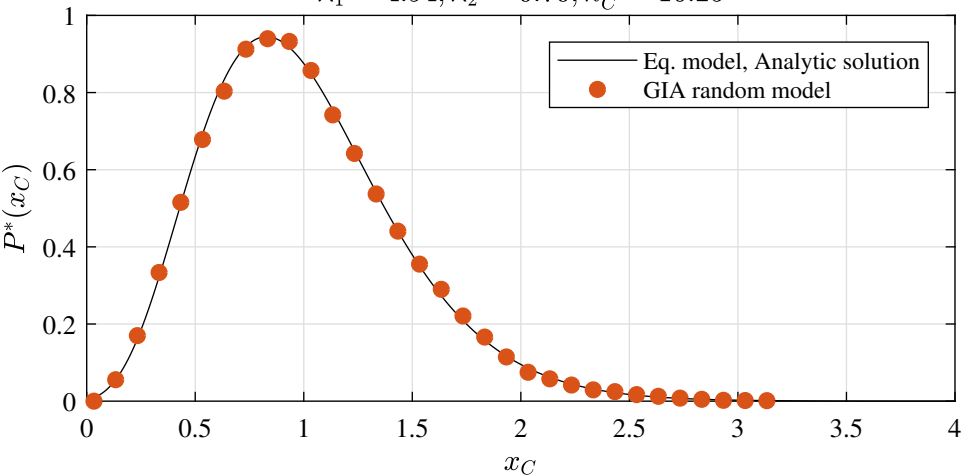

Supplement: supp [file elife_poa_e56532_Appendix_figure_13.pdf › elife_poa_e56532_Appendix_figure_13.pdf]

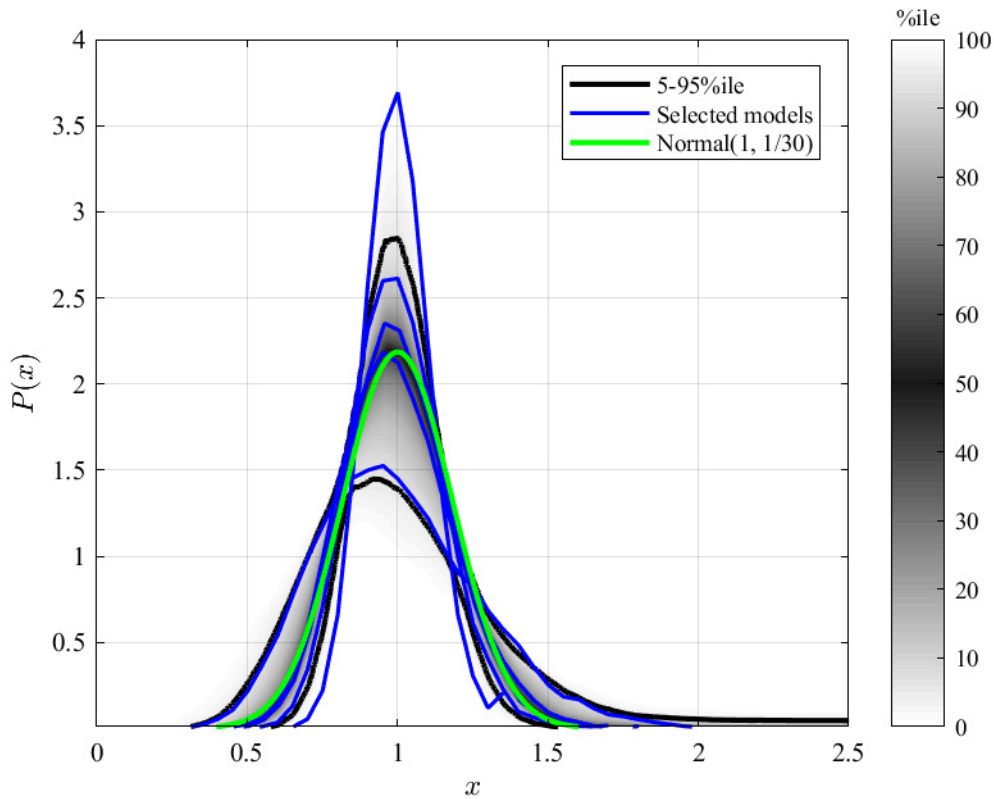

Supplement: supp [file elife_poa_e56532_Appendix_figure_14.pdf › elife_poa_e56532_Appendix_figure_14.pdf]

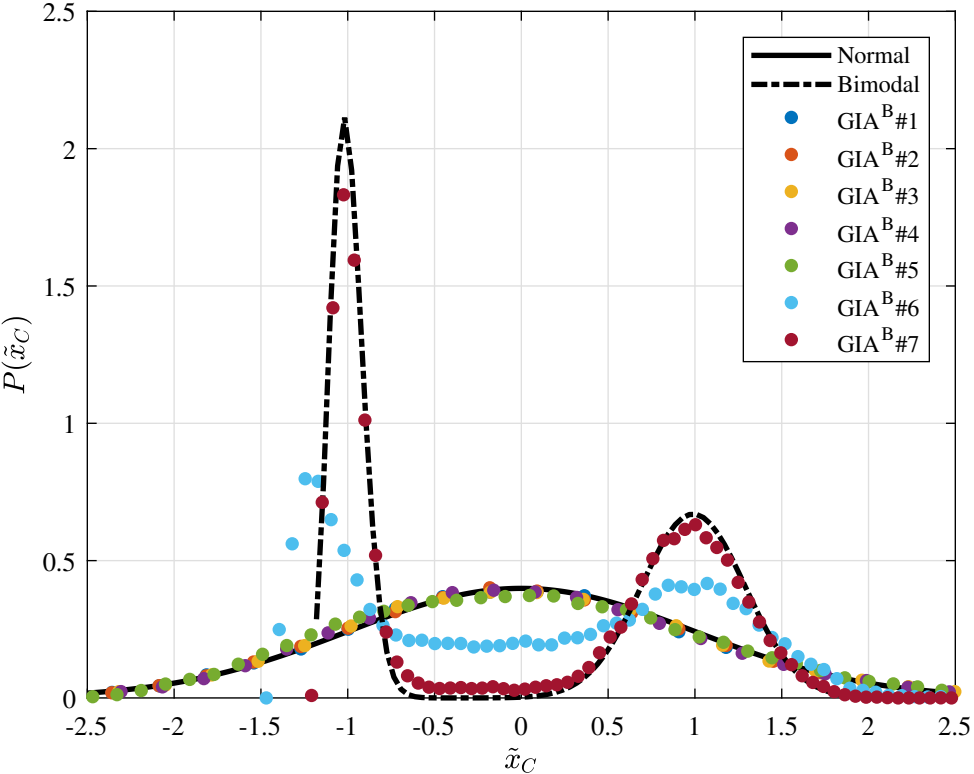

Supplement: supp [file elife_poa_e56532_Appendix_figure_15.pdf › elife_poa_e56532_Appendix_figure_15.pdf]

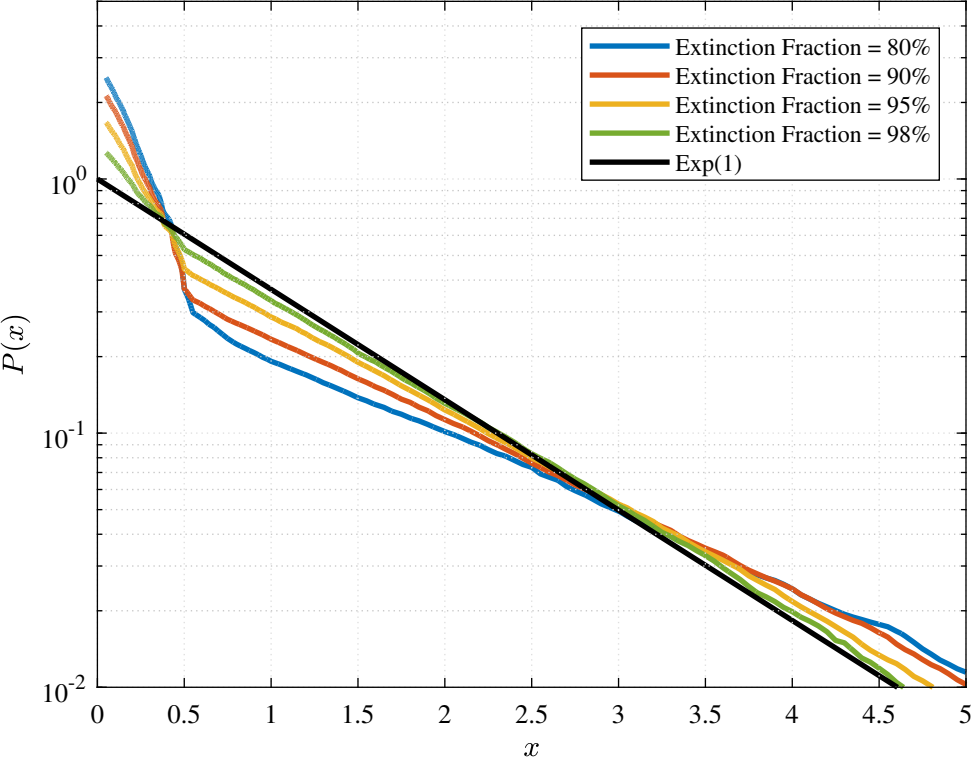

Supplement: supp [file elife_poa_e56532_Appendix_figure_16.pdf › elife_poa_e56532_Appendix_figure_16.pdf]

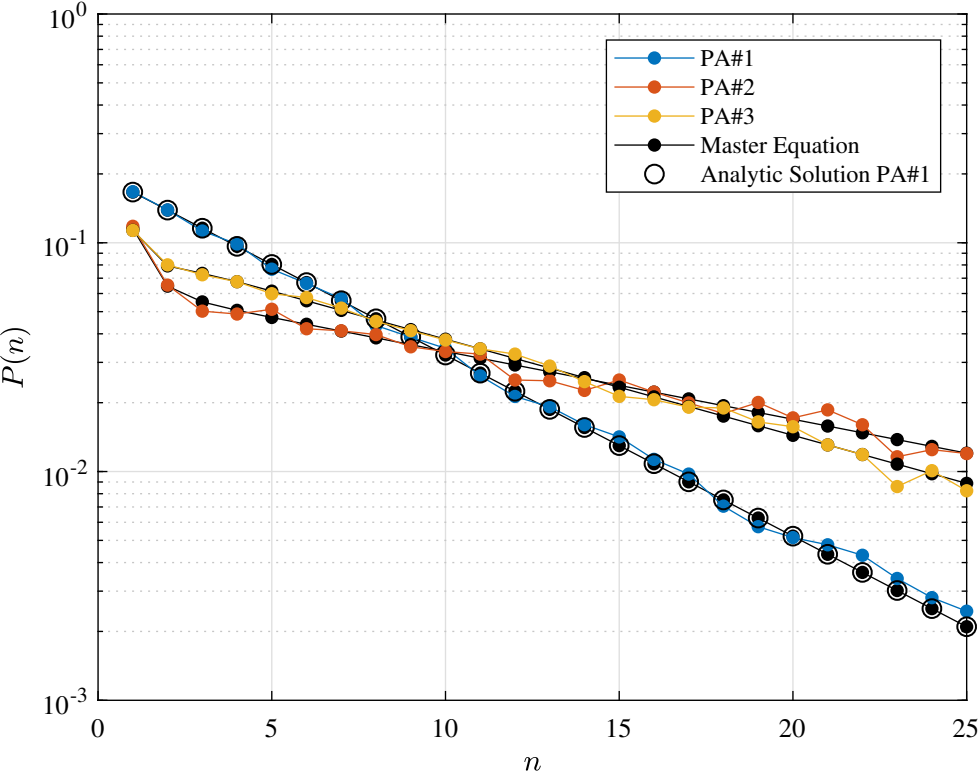

Supplement: supp [file elife_poa_e56532_Appendix_figure_2.pdf › elife_poa_e56532_Appendix_figure_2.pdf]

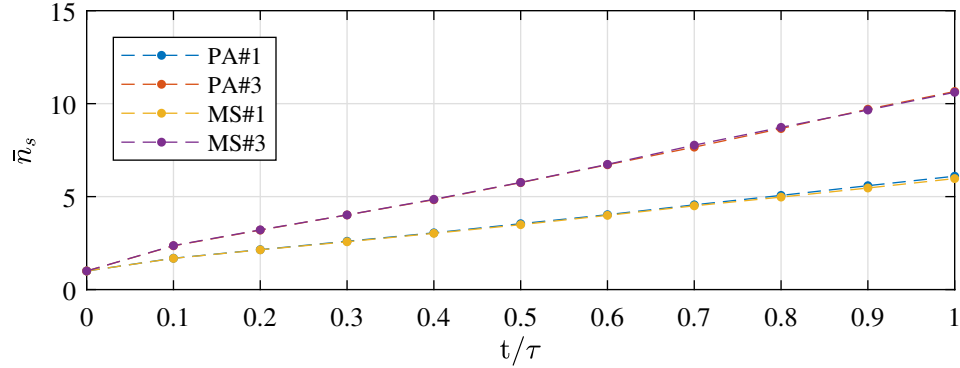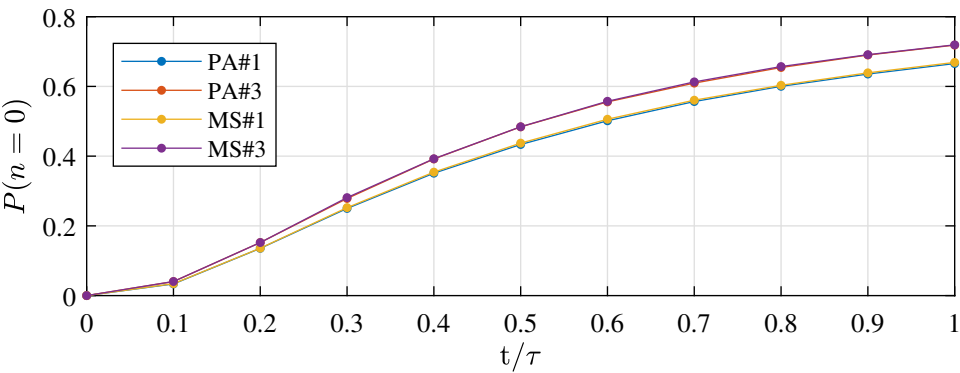

Supplement: supp [file elife_poa_e56532_Appendix_figure_3.pdf › elife_poa_e56532_Appendix_figure_3.pdf]

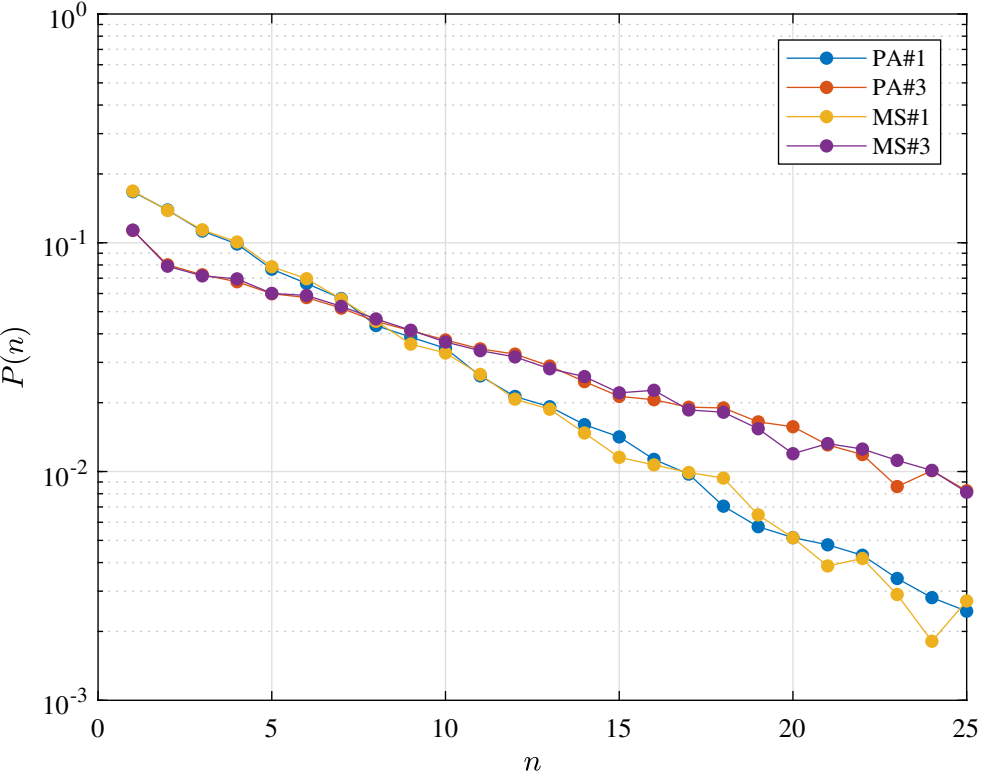

Supplement: supp [file elife_poa_e56532_Appendix_figure_4.pdf › elife_poa_e56532_Appendix_figure_4.pdf]

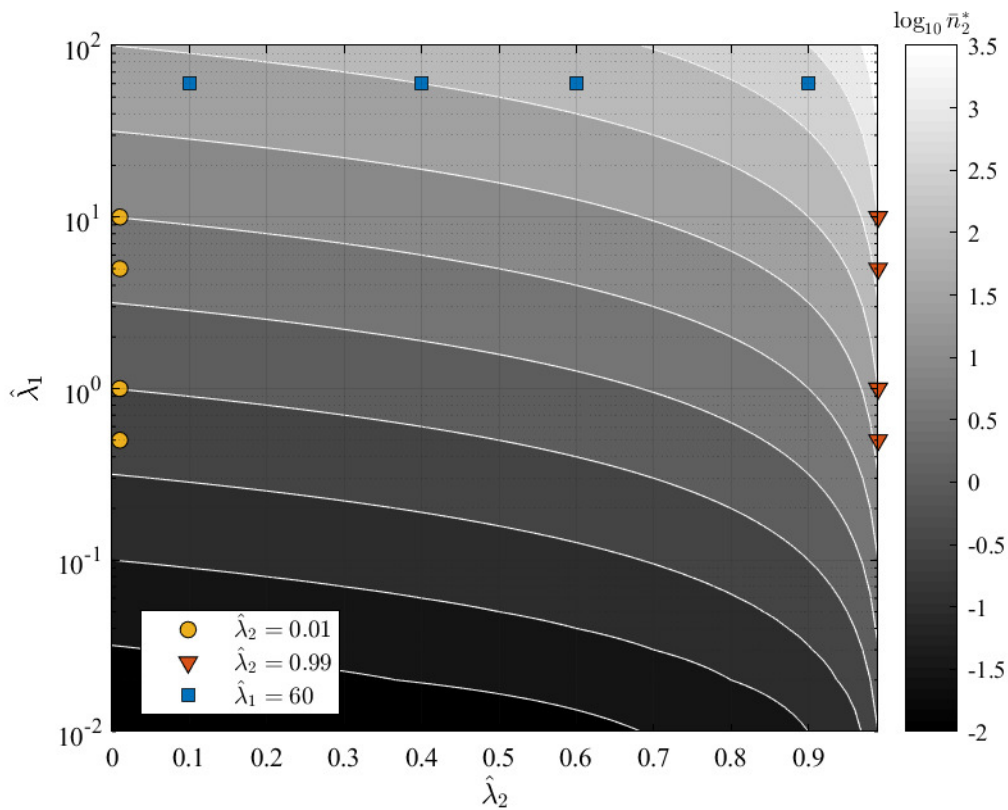

Supplement: supp [file elife_poa_e56532_Appendix_figure_5.pdf › elife_poa_e56532_Appendix_figure_5.pdf]

$$\hat{\lambda}_2 = 0.01$$

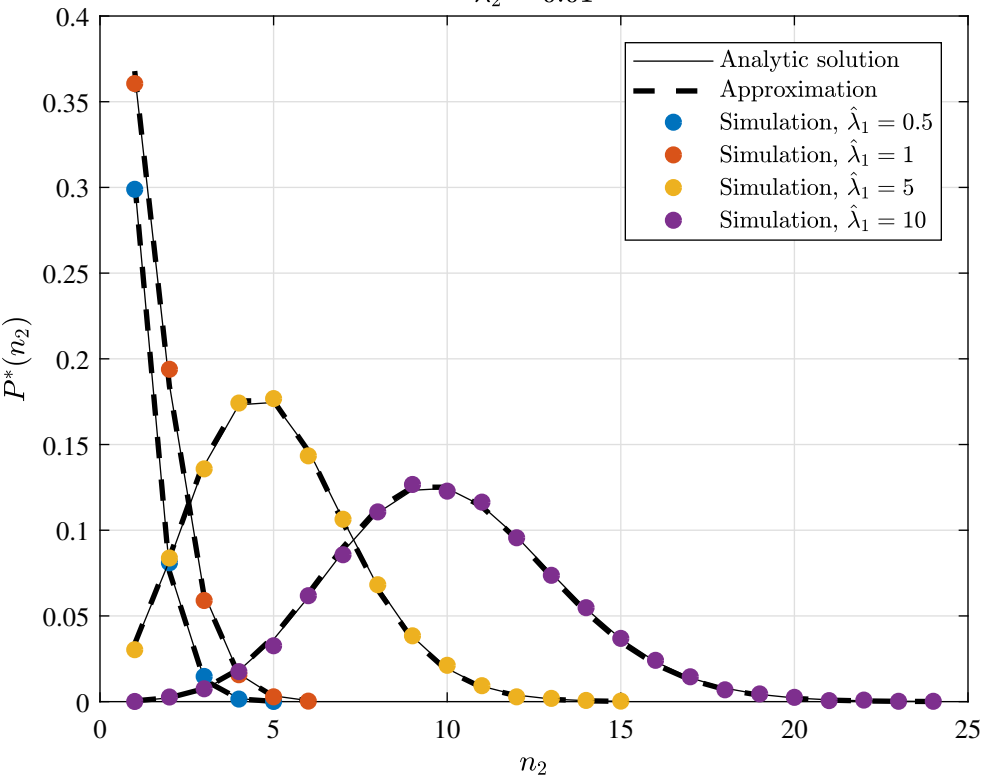

Supplement: supp [file elife_poa_e56532_Appendix_figure_6.pdf › elife_poa_e56532_Appendix_figure_6.pdf]

$$\hat{\lambda}_2 = 0.99$$

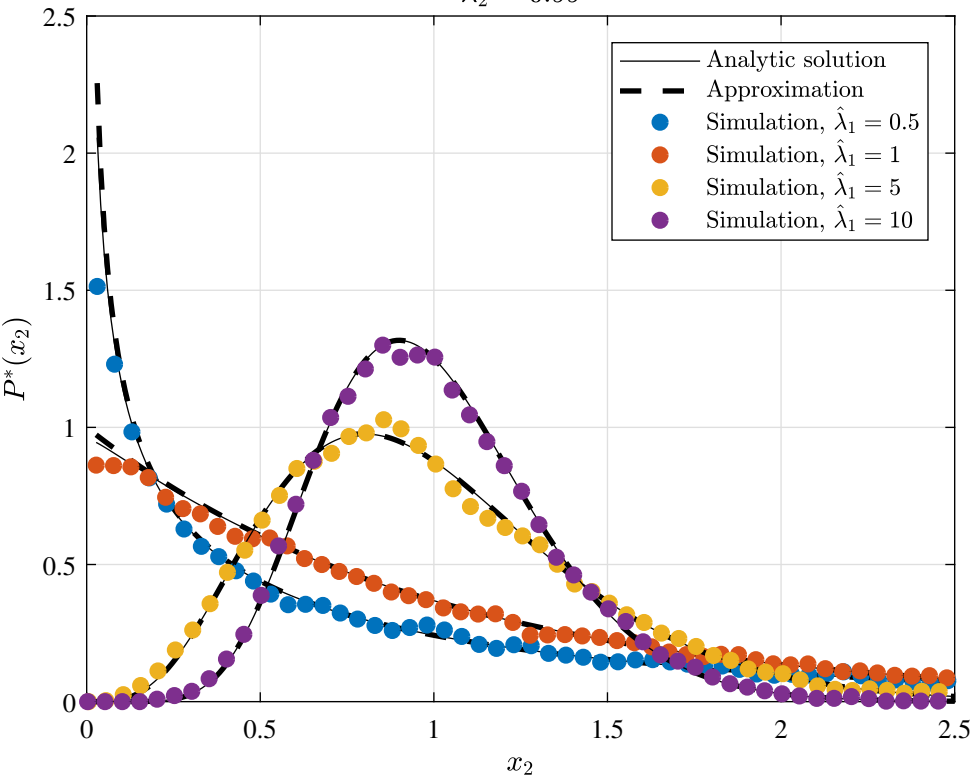

Supplement: supp [file elife_poa_e56532_Appendix_figure_7.pdf › elife_poa_e56532_Appendix_figure_7.pdf]

$$\hat{\lambda}_1 = 60$$

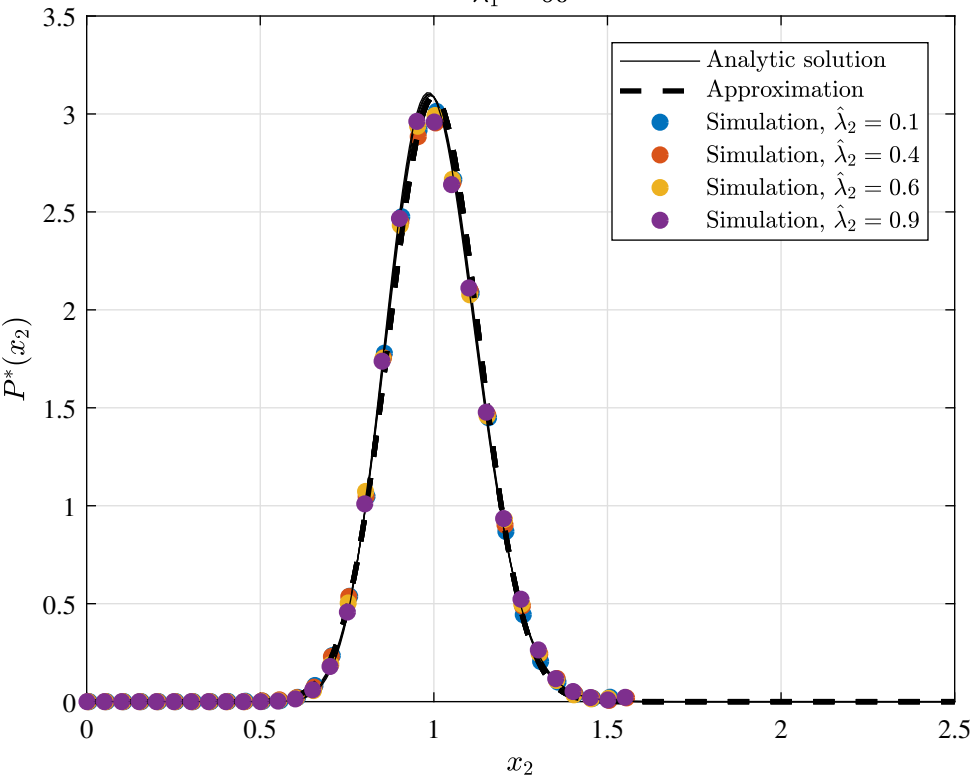

Supplement: supp [file elife_poa_e56532_Appendix_figure_8.pdf › elife_poa_e56532_Appendix_figure_8.pdf]

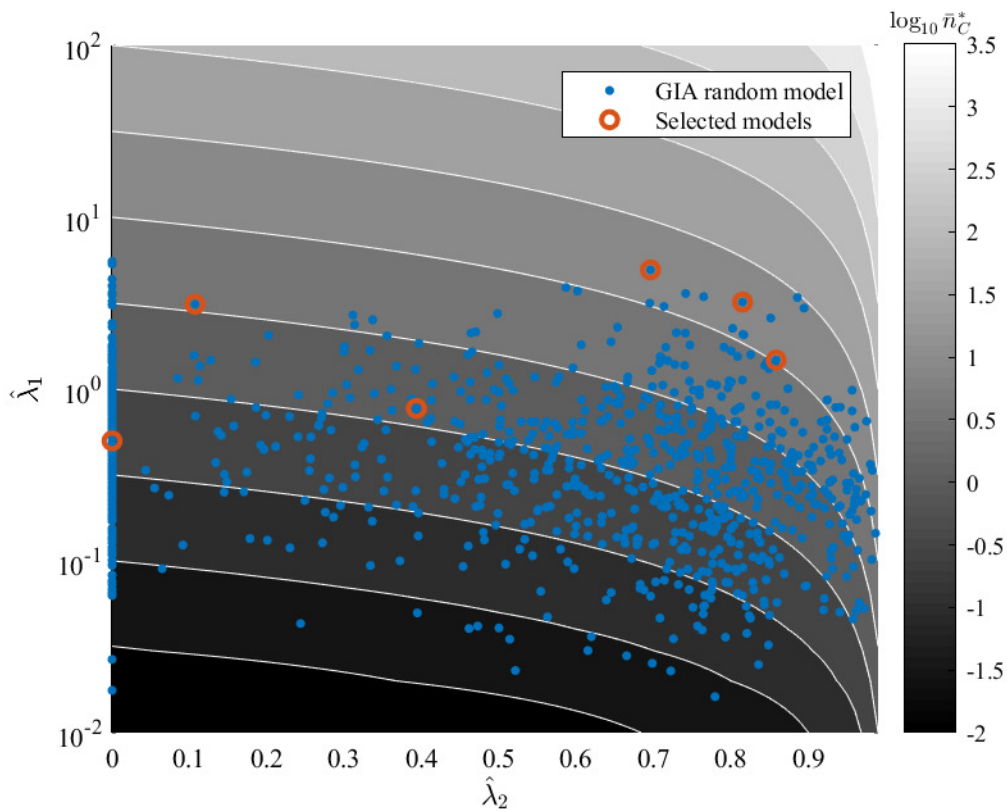

Supplement: supp [file elife_poa_e56532_Appendix_figure_9.pdf › elife_poa_e56532_Appendix_figure_9.pdf]
